# Supplementary material for: Running throughout Middle-Age Keeps Old Adult-Born Neurons Wired
Source: eNeuro. 2023 May 17;10(5):ENEURO.0084-23.2023. doi: 10.1523/ENEURO.0084-23.2023 (PMC10217125; doi:10.1523/ENEURO.0084-23.2023)
Supplement: Extended Data Table 1-1 — Statistical information Download Table 1-1, xlsx file. [file enu-eN-NWR-0084-23-s04.xlsx]

## Sheet: Sheet1
	Figure	Type of test		Statiscal values and df	Post-hoc Tukey tests	Description of the analysis
	1D	t-test, 2-tailed		t(6) = 8.514, p = 0.0001		Starter cells in the dentate gyrus (DG)
	1E	ANOVA with repeated measures	Main effect of treatment	F(1,6) = 72.49, p < 0.0001	CON vs RUN	Distribution of starter cells in the dorsal (dDG), intermediate (iDG) and ventral (vDG) dentate gyrus
			Main effect of region	F(2,12) = 53.34, p < 0.0001	dorsal vs intermediate
			Interaction	F(2,12) = 25.04, p < 0.0001	dorsal vs ventral
	1F	t-test, 2-tailed		t(6) = 3.676, p = 0.0104		Total traced cell (TC) number
	1G	t-test, 2-tailed		t(6) = 2.790, p = 0.0316		Tracer/starter cell (TC/SC) ratio
	2B	t-test, 2-tailed		t(6) = 3.258, p = 0.0173		Total number of traced interneurons (INT)
				t(6) = 0.8441, p = 0.4310		Total number of traced mature granule cells (mGC)
				t(6) = 1.476, p = 0.1904		Total number of traced mossy cells (MC)
				t(6) = 1.348, p = 0.2262		Total number of traced pyramidal cells (PYR)
				t(6) = 0.1345, p = 0.8974		Total number of traced astrocytes (AS)
	2H	ANOVA with repeated measures	Main effect of treatment	F(1,6) = 10.61, p< 0.017	CON vs RUN	Traced interneurons in the DG, CA3, CA2 and CA1
			Main effect of region	F(3,18) = 56.33, p < 0.0001	DG vs CA1,CA2,CA3
			Interaction	F(3,18) = 7.005, p < 0.0026
	2I	ANOVA with repeated measures	Main effect of treatment	F(1,6) = 2.74, p > 0.14		Ratio of interneurons to starter cells
			Main effect of region	F(3,18) = 110.247 <.0001	DG vs CA1,CA2,CA3
			Interaction	F(3,18) = 6.5, p < 0.036
	2L DG	ANOVA with repeated measures	Main effect of treatment	F(1,6) = 8.1, p < 0.029	CON vs RUN	Traced interneurons in hilus, granule cell layer (GCL) and molecular layer (ML)
			Main effect of region	F(2,12) = 17.38, p < 0.0003
			Interaction	F(2,12) = 3.24, p < 0.074	GCL vs ML
					Hilus vs ML
	2L CA3	ANOVA with repeated measures	Main effect of treatment	F(1,6) = 11.79, p < 0.0139	CON vs RUN	Traced interneurons in area CA3 strati. Oriens, stratum oriens; Luc, stratum lucidum; Rad, stratum radiatum; L-M, stratum moleculare
			Main effect of region	F(3,18) = 11.90, p < 0.0002
			Interaction	F(3,18) = 1.94, p > 0.15	Oriens vs Luc
					Oriens vs Rad
					Oriens vs L-M
	2L CA1	ANOVA with repeated measures	Main effect of treatment	F(1,6) = 11.33, p < 0.015	CON vs RUN	Traced interneurons in area CA1 strati. Oriens, stratum oriens; Rad, stratum radiatum; L-M, stratum moleculare
			Main effect of region	F(2,12) = 1.81, p > 0.20
			Interaction	F(2,12) = 0.36, p > 0.70
	3G	ANOVA with repeated measures	Main effect of treatment	F(1,6) = 1.84, p > 0.22		Traced pyramidal cells (PYR) in areas CA3, CA2, CA1
			Main effect of region	F(2,12) = 19.97, p < 0.0002	CA3 vs CA1
			Interaction	F(2,12) = 1.56, p > 0.24	CA3 vs CA2
	3I CA3	ANOVA with repeated measures	Main effect of treatment	F(1,6) = 2.38, p > 0.17		Distribution of traced pyramidal cells (PYR) in the dorsal, intermediate (Inter) and ventral area CA3
			Main effect of region	F(2,12) = 11.41, p < 0.0017	Dorsal vs ventral
			Interaction	F(2,12) = 5.37, p < 0.021	Intermediate vs ventral
	3I CA2	ANOVA with repeated measures	Main effect of treatment	F(1,6) = 0.97, p > 0.76		Distribution of traced pyramidal cells (PYR) in the dorsal, intermediate (Inter) and ventral area CA2
			Main effect of region	F(2,12) = 1.42, p > 0.27
			Interaction	F(2,12) = 0.97, p > 0.40
	3I CA1	ANOVA with repeated measures	Main effect of treatment	F(1,6) = 0.79, p > 0.40		Distribution of traced pyramidal cells (PYR) in the dorsal, intermediate (Inter) and ventral area CA1
			Main effect of region	F(2,12) = 1.84, p > 0.20
			Interaction	F(2,12) = 2.20, p > 0.15
	4D	t-test, 2-tailed		t(6) = 3.979, p = 0.0073		Traced cells in subicular complex (SUB-C)
	4F	ANOVA with repeated measures	Main effect of treatment	F(1,6) = 13.40, p < 0.0106	CON vs RUN	Traced cells in the subiculum (SUB), parasubiculum (PARA) and presubiculum (PRE)
			Main effect of region	F(2,12) = 16.74, p < 0.0003	SUB vs PARA
			Interaction	F(2,12) = 9.42, p < 0.035	SUB vs PRE
	4H	ANOVA with repeated measures	Main effect of treatment	F(1,6) = 11.47, p < 0.014	CON vs RUN	Distribution of traced subicular cells (SUB) in the dorsal, intermediate (Inter) and ventral hippocampus
			Main effect of region	F(2,12) = 14.30, p < 0.0007	dorsal vs intermediate
			Interaction	F(2,12) = 9.28, p < 0.0037	dorsal vs ventral
	4I	t-test, 2-tailed		t(6) = 1.388, p = 0.2145		Ratio of connectivity between SUB and starter cells
	5C	t-test, 2-tailed		t(6) = 3.234, p = 0.0178		Total number of traced cells in the entorhinal cortex (EC)
	5B	Kolmogorov-Smirnov		p = 0.0286		Traced cell number in perirhinal cortex (PRh)
	5C	t-test, 2-tailed		t(6) = 3.234, p = 0.0178		Total number of traced cells in the entorhinal cortex (EC)
	5D	ANOVA with repeated measures	Main effect of treatment	F(1,6) = 10.45, p < 0.017	CON vs RUN	Number of traced cells in the caudomedial entorhinal cortex (Cent), medial entorhinal cortex (MEC) and lateral entorhinal cortex (LEC)
			Main effect of region	F(2,12) = 29.67, p < 0.0001	CEnt vs MEC
			Interaction	F(2,12) = 16.03, p < 0.0004	LEC vs MEC
	5E	ANOVA with repeated measures	Main effect of treatment	F(1,6) = 2.89, p > 0.13	CON vs RUN	Ratio of traced to starter cells (SC) in the caudomedial entorhinal cortex (Cent), medial entorhinal cortex (MEC) and lateral entorhinal cortex (LEC)
			Main effect of region	F(2,12) = 33.51, p < 0.0001	CEnt vs MEC
			Interaction	F(2,12) = 19.54, p < 0.0002	LEC vs MEC
	6C	ANOVA with repeated measures	Main effect of treatment	F(1,6) = 0.80, p > 0.40		Traced cells in the medial septum (MS) and diagonal band of Broca (DBB)
			Main effect of region	F(1,6) = 12.75, p < 0.0118	MS vs DBB
			Interaction	F(1,6) = 0.61, p > 0.46
	6D	ANOVA with repeated measures	Main effect of treatment	F(1,6) = 3.89, p < 0.095		Ratio of traced to starter cells in the medial septum (MS) and diagonal band of Broca (DBB)
			Main effect of region	F(1,6) = 12.38, p < 0.012	MS vs DBB
			Interaction	F(1,6) = 1.13, p > 0.32
	6F	t-test, 2-tailed		t(6) = 1.309, p = 0.2386		Total number of medial mammillary nucleus cells (MMN)
	6H	t-test, 2-tailed		t(6) = 1.698, p = 0.1405		Total number of Raphe nucleus cells (RN)
	6J	t-test, 2-tailed		t(6) = 2.178, p = 0.0723		Total number of thalamic nucleus cells (ThN)
	Ext 1A	Linear regression		F(1,7) = 12.86, p < 0.0089		Monthly distance run over time
	Ext 1D	t-test, unpaired		t(6) = 5.196, p = 0.002;		Total number of GFP+ cells in the dentate gyrus
	Ext 1E	ANOVA with repeated measures	Main effect of treatment	F(1,6) = 27.00, p < 0.002	CON vs RUN	Distribution of GFP+ cell in the dorsal (dDG), intermediate (iDG) and ventral (vDG) dentate gyrus
			Main effect of region	F(2,12) = 17.85, p < 0.003	dorsal vs intermediate
			Interaction	F(2,12) = 8.64, p < 0.0047	dorsal vs ventral
	Ext 2B	t-test, unpaired		t(6) = 1.984, p = 0.0945		Ratio of traced mature granule cells (mGC) to starter cells (SC)
	Ext 2D	ANOVA with repeated measures	Main effect of treatment	F(1,6) = 0.275, p > 0.61		Distribution of traced mature granule cells (mGC) in the dorsal (dDG), intermediate (iDG) and ventral (vDG) dentate gyrus
			Main effect of region	F(2,12) = 6.624, p < 0.0115
			Interaction	F(2,12) = 0.272, p > 0.77
	Ext 2F	t-test, unpaired		t(6) = 1.408, p = 0.2089		Ratio of traced mossy cells (MC) to starter cells (SC)
	Ext 2H	ANOVA with repeated measures	Main effect of treatment	F(1,6) = 1.39, p > 0.28		Distribution of mossy cells (MC) in the dorsal (dDG), intermediate (iDG) and ventral (vDG) dentate gyrus
			Main effect of region	F(2,12) = 1.374, p > 0.29	dorsal vs intermediate
			Interaction	F(2,12) = 0.062, p > 0.94
	Ext 2J	t-test, unpaired		t(6) = 1.872, p = 0.1104		Ratio of traced astrocytes (AS) to starter cells (SC)
	Ext 2L	ANOVA with repeated measures	Main effect of treatment	F(1,6) = 0.016, p > 0.90		Distribution of astrocytes (AS) in the dorsal (dDG), intermediate (iDG) and ventral (vDG) dentate gyrus
			Main effect of region	F(2,12) = 10.19, p < 0.0026	dorsal vs intermediate
			Interaction	F(2,12) = 0.744, p > 0.49	dorsal vs ventral
	Ext 5C	t-test, unpaired		t(6) = 0.5774, p = 0.5847		Total number of sensory cortex cells (SCtx)
